# Supplementary material for: Solvent-Free Processed Cathode Slurry with Carbon Nanotube Conductors for Li-Ion Batteries
Source: MDPI journal article supplement (doi:10.3390/nano13020324), 2023-01-12
Supplement: s1 [file s1]

# Solvent-Free Processed Cathode Slurry with Carbon Nanotube Conductors for Li-Ion Batteries

Gyori Park <sup>1</sup>, Hyun-Suk Kim <sup>2,\*</sup> and Kyung Jin Lee <sup>1,\*</sup>

<sup>1</sup> Department of Chemical Engineering and Applied Chemistry, Chungnam National University, Daejeon 34134, Republic of Korea

<sup>2</sup> Department of Materials Science and Engineering, Chungnam National University, Daejeon 34134, Republic of Korea

\* Correspondence: khs3297@cnu.ac.kr (H.-S.K.); kjlee@cnu.ac.kr (K.J.L.)

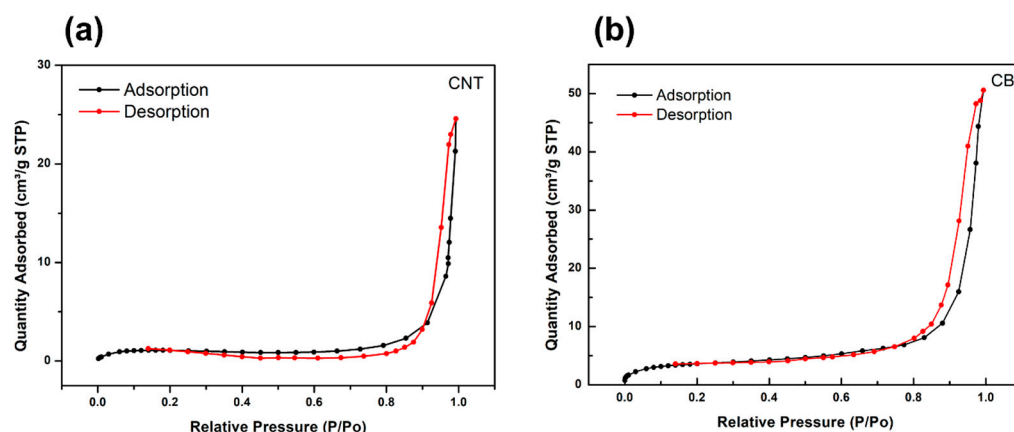

**Figure S1.** BET adsorption and desorption analyses graph of (a) CNT based electrode, (b) CB based electrode.

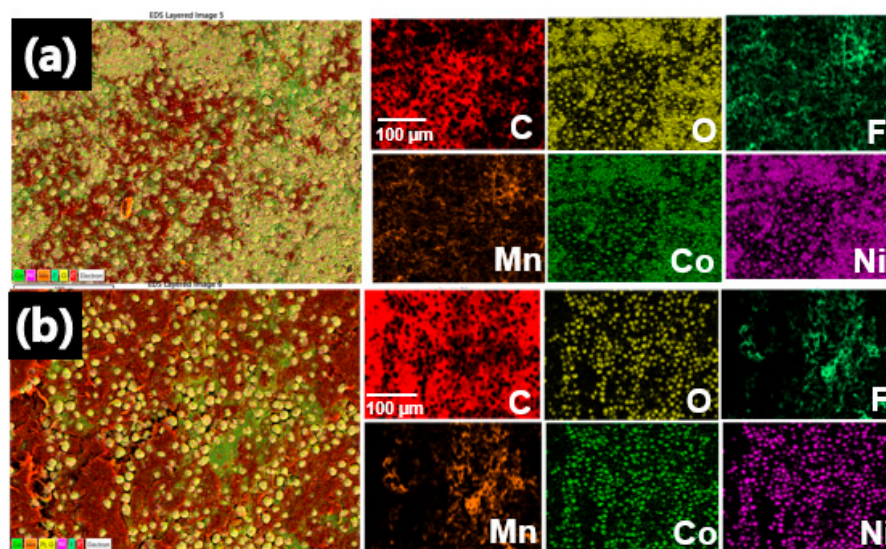

**Figure S2.** EDS map images of the dry process CNT based cathode (a) 90 : 5 : 5 (NCM811 : CNT : PTFE), (b) 70 : 25 : 5 (NCM811 : CNT : PTFE).

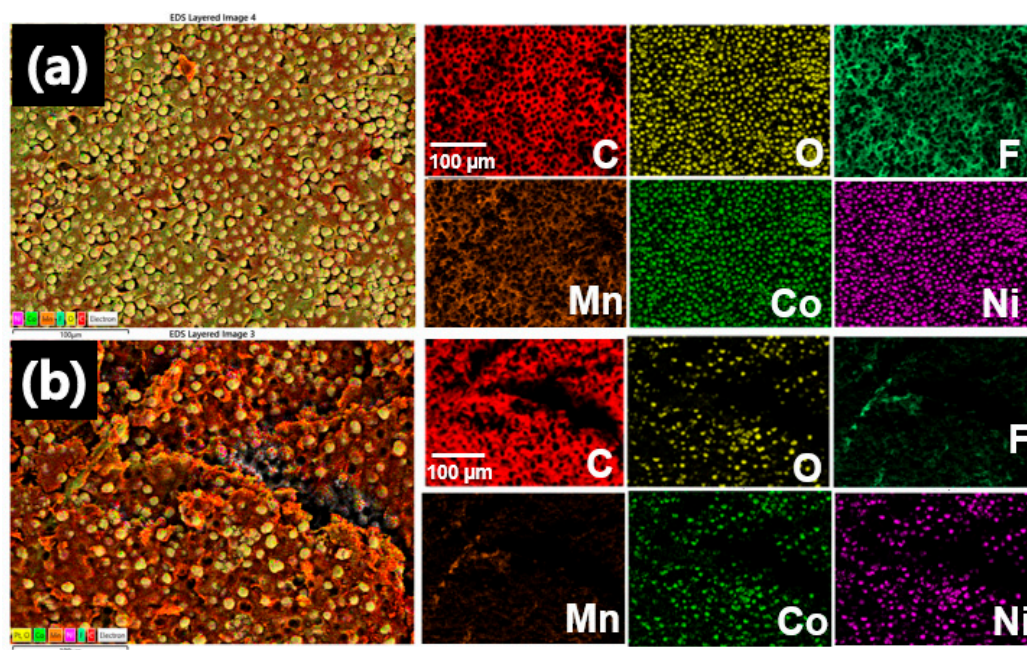

**Figure S3.** EDS map images of the dry process CB based cathode (a) 90 : 5 : 5 (NCM811 : CB : PTFE), (b) 70 : 25 : 5 (NCM811 : CB : PTFE).

**Table S1.** Detail information from Dry process CNT, Dry process CB based cathode sheet.

| Ratio of<br>NCM: Carbon/CB:<br>binder | Electrode<br>area (cm <sup>2</sup> ) | Thickness<br>(μm)<br>(Without Al<br>foil) | Weight (g)<br>(Without Al<br>foil) | Electro<br>density<br>(g/cm <sup>3</sup> ) | Electrode<br>Loading<br>Level<br>(mg/cm <sup>2</sup> ) |
|---------------------------------------|--------------------------------------|-------------------------------------------|------------------------------------|--------------------------------------------|--------------------------------------------------------|
| <b>Dry-CNT (NCM811 : CNT : PTFE)</b>  |                                      |                                           |                                    |                                            |                                                        |
| 90 : 5 : 5                            | 1.54                                 | 200                                       | 0.1                                | 3.25                                       | 65                                                     |
| 85 : 10 : 5                           | 1.54                                 | 210                                       | 0.11                               | 3.4                                        | 71                                                     |
| <b>Dry-CB (NCM811 : CB : PTFE)</b>    |                                      |                                           |                                    |                                            |                                                        |
| 90 : 5 : 5                            | 1.54                                 | 220                                       | 0.1                                | 2.95                                       | 65                                                     |
| 85 : 10 : 5                           | 1.54                                 | 200                                       | 0.093                              | 3.02                                       | 60                                                     |
